# Supplementary material
Source: publisher site journal article supplement (https://www.spandidos-publications.com/4527/downloadSupplementary)
Supplement: Supplementary file 1 [file downloadSupplementary]

Table S1. The demographic and clinicopathological characteristics of the patients

| Patients           | n  | Age (years) | Sex (male/female) | BMI (kg/m <sup>2</sup> ) |
|--------------------|----|-------------|-------------------|--------------------------|
| Cholangiocarcinoma | 12 | 62.32±5.86  | 8/4               | 15.21±3.15               |
